# Supplementary material
Source: Royal Society of Chemistry journal article supplement (doi:10.1039/d6nr00437g)
Supplement: d6nr00437g1.pdf [file d6nr00437g1.pdf]

## Support Information

### Solution-Processable Fe-Doped SnSe<sub>2</sub> Flakes with Tunable Morphology and Robust Near-Room-Temperature Ferromagnetism

Diqin Xiao,<sup>a</sup> Xia Chen,<sup>a</sup> Ya Nie,<sup>a</sup> Xi Zhang,<sup>a,\*</sup> Gang Xiang<sup>a,\*</sup>

<sup>a</sup> College of Physics, Sichuan University, Chengdu 610064, China

\*Corresponding authors' emails: xizhang@scu.edu.cn; gxiang@scu.edu.cn

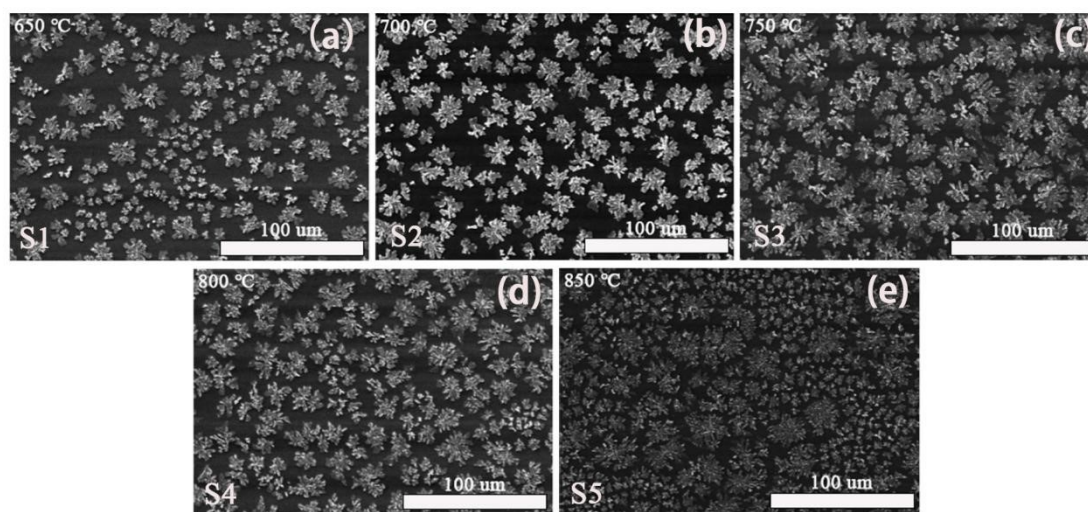

Figure 1. SEM images of undoped SnSe<sub>2</sub> samples. (a) S1 (650 °C), (b) S2 (700 °C), (c) S3 (750 °C), (d) S4 (800 °C) and (e) S5 (850 °C).
